# Supplementary material
Source: PubMed Central journal article supplement (PMC4848377)
Supplement: NIHMS770934-supplement-supplement_1.pdf [file NIHMS770934-supplement-supplement_1.pdf]

### Supplemental Table 1

Analysis of patterns of missing data. For each treatment group, we give the number of patients missing 48-month questionnaires and not missing 48-month questionnaires, with difference in means for each domain at the time point specified. For each comparison, not missing 48-month questionnaire is the reference, so a coefficient of 5 would represent that respondents had a score higher by 5 points at that time point compared with non-respondents.

|                  | Radical prostatectomy                             | Brachytherapy                                     | External-beam radiotherapy                       | Androgen-deprivation therapy                      |
|------------------|---------------------------------------------------|---------------------------------------------------|--------------------------------------------------|---------------------------------------------------|
| 3 months         |                                                   |                                                   |                                                  |                                                   |
| Urinary function | 157 (46%) vs 181 (54%)<br>0.91 (-2.53, 4.35) 0.6  | 25 (14%) vs 153 (86%)<br>2.17 (-4.49, 8.83) 0.5   | 33 (20%) vs 129 (80%)<br>0.24 (-4.66, 5.14) 0.9  | 5 (16%) vs 26 (84%)<br>15.74 (-2.28, 33.75) 0.084 |
| Urinary bother   | 159 (48%) vs 175 (52%)<br>-0.85 (-5.17, 3.47) 0.7 | 23 (13%) vs 152 (87%)<br>1.49 (-5.55, 8.53) 0.7   | 33 (21%) vs 127 (79%)<br>3.04 (-1.29, 7.38) 0.2  | 4 (14%) vs 25 (86%)<br>7.42 (-6.99, 21.83) 0.3    |
| Bowel function   | 161 (47%) vs 180 (53%)<br>-0.68 (-1.92, 0.55) 0.3 | 25 (14%) vs 153 (86%)<br>2.53 (-0.94, 6.00) 0.2   | 32 (20%) vs 127 (80%)<br>3.91 (0.00, 7.83) 0.050 | 5 (17%) vs 25 (83%)<br>4.35 (0.28, 8.43) 0.037    |
| Bowel bother     | 161 (47%) vs 181 (53%)<br>-0.71 (-2.82, 1.40) 0.5 | 25 (14%) vs 150 (86%)<br>6.44 (0.07, 12.82) 0.048 | 34 (21%) vs 126 (79%)<br>3.95 (-2.18, 10.08) 0.2 | 5 (18%) vs 23 (82%)<br>7.15 (-1.89, 16.20) 0.11   |
| Sexual function  | 165 (47%) vs 184 (53%)<br>-3.17 (-7.79, 1.44) 0.2 | 24 (14%) vs 149 (86%)<br>8.08 (-2.55, 18.70) 0.14 | 35 (22%) vs 126 (78%)<br>1.11 (-8.36, 10.58) 0.8 | 5 (16%) vs 26 (84%)<br>2.79 (-14.73, 20.31) 0.7   |

|                  |                         |                          |                             |                            |
|------------------|-------------------------|--------------------------|-----------------------------|----------------------------|
| Sexual bother    | 161 (47%) vs 179 (53%)  | 24 (14%) vs 148 (86%)    | 32 (20%) vs 125 (80%)       | 4 (13%) vs 26 (87%)        |
|                  | -1.49 (-5.90, 2.92) 0.5 | 4.97 (-3.08, 13.01) 0.2  | -1.32 (-7.92, 5.29) 0.7     | -14.27 (-32.73, 4.19) 0.12 |
| 6 months         |                         |                          |                             |                            |
| Urinary function | 148 (48%) vs 160 (52%)  | 29 (15%) vs 160 (85%)    | 35 (20%) vs 143 (80%)       | 7 (20%) vs 28 (80%)        |
|                  | 1.73 (-1.14, 4.60) 0.2  | 1.17 (-3.95, 6.29) 0.7   | -2.56 (-6.52, 1.39) 0.2     | -2.58 (-17.45, 12.29) 0.7  |
| Urinary bother   | 149 (49%) vs 153 (51%)  | 27 (14%) vs 160 (86%)    | 35 (20%) vs 143 (80%)       | 6 (18%) vs 28 (82%)        |
|                  | 1.63 (-1.83, 5.09) 0.4  | 0.90 (-4.90, 6.69) 0.8   | -1.45 (-5.38, 2.48) 0.5     | 7.89 (-3.76, 19.53) 0.2    |
| Bowel function   | 150 (49%) vs 157 (51%)  | 29 (15%) vs 160 (85%)    | 35 (20%) vs 141 (80%)       | 7 (21%) vs 27 (79%)        |
|                  | -0.19 (-1.60, 1.22) 0.8 | 0.75 (-2.12, 3.62) 0.6   | -1.99 (-4.80, 0.82) 0.2     | -2.62 (-11.34, 6.11) 0.5   |
| Bowel bother     | 151 (49%) vs 157 (51%)  | 29 (16%) vs 158 (84%)    | 35 (20%) vs 140 (80%)       | 7 (22%) vs 25 (78%)        |
|                  | 0.26 (-1.85, 2.37) 0.8  | -1.80 (-7.76, 4.15) 0.6  | -5.39 (-10.61, -0.17) 0.043 | -9.67 (-30.63, 11.29) 0.3  |
| Sexual function  | 154 (49%) vs 160 (51%)  | 28 (15%) vs 156 (85%)    | 36 (20%) vs 140 (80%)       | 7 (20%) vs 28 (80%)        |
|                  | -1.48 (-6.12, 3.15) 0.5 | 0.77 (-9.08, 10.63) 0.9  | 0.49 (-8.89, 9.86) 0.9      | -10.18 (-25.27, 4.91) 0.2  |
| Sexual bother    | 148 (48%) vs 159 (52%)  | 27 (15%) vs 155 (85%)    | 35 (20%) vs 137 (80%)       | 6 (18%) vs 27 (82%)        |
|                  | -0.70 (-5.34, 3.95) 0.8 | -2.14 (-10.70, 6.42) 0.6 | -5.18 (-11.84, 1.47) 0.13   | -8.71 (-22.75, 5.33) 0.2   |
| 9 months         |                         |                          |                             |                            |
| Urinary function | 120 (44%) vs 150 (56%)  | 21 (12%) vs 156 (88%)    | 33 (20%) vs 133 (80%)       | 6 (19%) vs 26 (81%)        |
|                  | 0.62 (-2.30, 3.54) 0.7  | -0.82 (-6.12, 4.49) 0.8  | -0.55 (-3.83, 2.74) 0.7     | -5.49 (-19.95, 8.96) 0.4   |
| Urinary bother   | 118 (45%) vs 145 (55%)  | 20 (11%) vs 155 (89%)    | 33 (20%) vs 131 (80%)       | 6 (19%) vs 26 (81%)        |

|                  |                        |     |                       |       |                       |     |                       |     |
|------------------|------------------------|-----|-----------------------|-------|-----------------------|-----|-----------------------|-----|
|                  | 1.36 (-1.69, 4.42)     | 0.4 | 1.75 (-4.42, 7.92)    | 0.6   | 2.32 (-1.65, 6.29)    | 0.2 | 6.24 (-12.05, 24.52)  | 0.5 |
| Bowel function   | 120 (44%) vs 152 (56%) |     | 21 (12%) vs 156 (88%) |       | 32 (20%) vs 131 (80%) |     | 6 (19%) vs 25 (81%)   |     |
|                  | -0.47 (-1.72, 0.78)    | 0.5 | 1.43 (-1.72, 4.58)    | 0.4   | 0.66 (-2.21, 3.52)    | 0.7 | 1.89 (-6.90, 10.68)   | 0.7 |
| Bowel bother     | 124 (45%) vs 150 (55%) |     | 21 (12%) vs 154 (88%) |       | 34 (20%) vs 132 (80%) |     | 6 (20%) vs 24 (80%)   |     |
|                  | -0.30 (-2.40, 1.80)    | 0.8 | 0.05 (-6.53, 6.63)    | 1     | 2.10 (-3.37, 7.57)    | 0.4 | 5.60 (-15.55, 26.75)  | 0.6 |
| Sexual function  | 127 (46%) vs 151 (54%) |     | 20 (12%) vs 153 (88%) |       | 35 (21%) vs 132 (79%) |     | 6 (19%) vs 26 (81%)   |     |
|                  | -1.06 (-6.58, 4.46)    | 0.7 | -1.29 (-12.60, 10.03) | 0.8   | 1.08 (-8.81, 10.97)   | 0.8 | -5.85 (-27.94, 16.24) | 0.6 |
| Sexual bother    | 123 (45%) vs 148 (55%) |     | 20 (12%) vs 150 (88%) |       | 34 (21%) vs 131 (79%) |     | 5 (16%) vs 26 (84%)   |     |
|                  | -2.87 (-7.82, 2.08)    | 0.3 | -3.03 (-12.54, 6.48)  | 0.5   | -1.02 (-7.91, 5.87)   | 0.8 | -12.08 (-30.64, 6.48) | 0.2 |
| 12 months        |                        |     |                       |       |                       |     |                       |     |
| Urinary function | 136 (45%) vs 163 (55%) |     | 28 (16%) vs 147 (84%) |       | 28 (17%) vs 134 (83%) |     | 7 (21%) vs 26 (79%)   |     |
|                  | 0.34 (-2.53, 3.22)     | 0.8 | 0.11 (-4.96, 5.18)    | 1     | -2.52 (-6.01, 0.98)   | 0.2 | -1.77 (-13.22, 9.68)  | 0.8 |
| Urinary bother   | 133 (46%) vs 158 (54%) |     | 27 (16%) vs 145 (84%) |       | 28 (18%) vs 132 (83%) |     | 7 (21%) vs 26 (79%)   |     |
|                  | 1.22 (-2.04, 4.49)     | 0.5 | -1.24 (-6.02, 3.54)   | 0.6   | -0.62 (-4.71, 3.47)   | 0.8 | 1.39 (-11.85, 14.62)  | 0.8 |
| Bowel function   | 138 (46%) vs 164 (54%) |     | 28 (16%) vs 146 (84%) |       | 28 (18%) vs 131 (82%) |     | 7 (22%) vs 25 (78%)   |     |
|                  | -0.32 (-1.67, 1.02)    | 0.6 | 3.26 (0.52, 6.01)     | 0.020 | -1.41 (-4.54, 1.71)   | 0.4 | -3.12 (-8.05, 1.81)   | 0.2 |
| Bowel bother     | 139 (46%) vs 163 (54%) |     | 28 (16%) vs 145 (84%) |       | 30 (19%) vs 130 (81%) |     | 7 (23%) vs 23 (77%)   |     |
|                  | -0.17 (-2.18, 1.84)    | 0.9 | -0.65 (-6.17, 4.86)   | 0.8   | -1.72 (-6.88, 3.45)   | 0.5 | -3.29 (-18.89, 12.30) | 0.7 |
| Sexual function  | 142 (46%) vs 164 (54%) |     | 27 (16%) vs 143 (84%) |       | 30 (19%) vs 130 (81%) |     | 7 (22%) vs 25 (78%)   |     |

|                  |                        |     |                       |     |                       |       |                       |      |
|------------------|------------------------|-----|-----------------------|-----|-----------------------|-------|-----------------------|------|
|                  | -0.47 (-5.80, 4.85)    | 0.9 | -6.44 (-16.70, 3.82)  | 0.2 | 4.33 (-6.06, 14.71)   | 0.4   | 3.70 (-19.47, 26.87)  | 0.7  |
| Sexual bother    | 140 (46%) vs 163 (54%) |     | 27 (16%) vs 143 (84%) |     | 28 (18%) vs 127 (82%) |       | 6 (19%) vs 25 (81%)   |      |
|                  | 1.29 (-3.77, 6.34)     | 0.6 | -4.18 (-12.88, 4.53)  | 0.3 | 3.81 (-3.80, 11.42)   | 0.3   | 2.38 (-17.48, 22.25)  | 0.8  |
| 18 months        |                        |     |                       |     |                       |       |                       |      |
| Urinary function | 119 (43%) vs 157 (57%) |     | 22 (12%) vs 156 (88%) |     | 26 (16%) vs 139 (84%) |       | 5 (15%) vs 28 (85%)   |      |
|                  | 0.15 (-2.72, 3.02)     | 0.9 | -0.32 (-5.36, 4.73)   | 0.9 | -4.22 (-7.58, -0.86)  | 0.014 | 2.74 (-11.83, 17.30)  | 0.7  |
| Urinary bother   | 118 (43%) vs 154 (57%) |     | 21 (12%) vs 156 (88%) |     | 26 (16%) vs 137 (84%) |       | 5 (16%) vs 27 (84%)   |      |
|                  | -0.81 (-4.11, 2.49)    | 0.6 | 1.45 (-4.87, 7.77)    | 0.7 | -1.83 (-5.91, 2.25)   | 0.4   | 12.21 (-4.18, 28.60)  | 0.14 |
| Bowel function   | 120 (43%) vs 158 (57%) |     | 22 (12%) vs 155 (88%) |     | 26 (16%) vs 136 (84%) |       | 5 (16%) vs 27 (84%)   |      |
|                  | -0.18 (-1.44, 1.08)    | 0.8 | 1.51 (-1.78, 4.80)    | 0.4 | -0.88 (-4.36, 2.61)   | 0.6   | -1.32 (-8.17, 5.53)   | 0.7  |
| Bowel bother     | 120 (43%) vs 158 (57%) |     | 22 (13%) vs 153 (87%) |     | 27 (17%) vs 135 (83%) |       | 5 (17%) vs 25 (83%)   |      |
|                  | -1.24 (-3.33, 0.85)    | 0.2 | 1.83 (-5.37, 9.04)    | 0.6 | -1.55 (-6.89, 3.79)   | 0.6   | 3.77 (-3.50, 11.04)   | 0.3  |
| Sexual function  | 123 (44%) vs 158 (56%) |     | 21 (12%) vs 148 (88%) |     | 26 (16%) vs 133 (84%) |       | 5 (16%) vs 27 (84%)   |      |
|                  | 2.79 (-2.93, 8.52)     | 0.3 | 2.98 (-7.52, 13.47)   | 0.6 | 0.39 (-10.42, 11.21)  | 0.9   | -4.85 (-28.89, 19.19) | 0.7  |
| Sexual bother    | 119 (43%) vs 157 (57%) |     | 20 (12%) vs 148 (88%) |     | 24 (15%) vs 132 (85%) |       | 4 (13%) vs 26 (87%)   |      |
|                  | -0.90 (-5.82, 4.02)    | 0.7 | -4.92 (-13.94, 4.11)  | 0.3 | -1.80 (-10.28, 6.68)  | 0.7   | -4.45 (-30.92, 22.02) | 0.7  |
| 24 months        |                        |     |                       |     |                       |       |                       |      |
| Urinary function | 114 (41%) vs 164 (59%) |     | 19 (11%) vs 157 (89%) |     | 25 (15%) vs 138 (85%) |       | 3 (9.7%) vs 28 (90%)  |      |
|                  | 1.56 (-1.15, 4.27)     | 0.3 | 0.66 (-4.35, 5.66)    | 0.8 | -5.64 (-9.88, -1.39)  | 0.010 | 11.13 (-8.80, 31.06)  | 0.3  |

|                  |                        |       |                        |       |                       |       |                       |       |
|------------------|------------------------|-------|------------------------|-------|-----------------------|-------|-----------------------|-------|
| Urinary bother   | 116 (42%) vs 159 (58%) |       | 19 (11%) vs 157 (89%)  |       | 25 (15%) vs 137 (85%) |       | 3 (9.7%) vs 28 (90%)  |       |
|                  | 1.32 (-1.82, 4.46)     | 0.4   | 4.45 (-1.10, 9.99)     | 0.12  | -4.59 (-9.36, 0.19)   | 0.059 | 7.26 (-8.35, 22.86)   | 0.3   |
| Bowel function   | 113 (41%) vs 164 (59%) |       | 19 (11%) vs 157 (89%)  |       | 25 (16%) vs 136 (84%) |       | 3 (10%) vs 27 (90%)   |       |
|                  | -0.46 (-1.65, 0.73)    | 0.4   | 3.31 (-0.51, 7.12)     | 0.089 | -0.60 (-3.31, 2.11)   | 0.7   | -5.63 (-16.62, 5.37)  | 0.3   |
| Bowel bother     | 113 (41%) vs 164 (59%) |       | 19 (11%) vs 155 (89%)  |       | 26 (16%) vs 134 (84%) |       | 3 (11%) vs 25 (89%)   |       |
|                  | 0.39 (-1.54, 2.33)     | 0.7   | 4.68 (-2.94, 12.30)    | 0.2   | -4.64 (-10.82, 1.55)  | 0.14  | -5.27 (-24.51, 13.97) | 0.6   |
| Sexual function  | 117 (42%) vs 164 (58%) |       | 18 (11%) vs 153 (89%)  |       | 25 (16%) vs 132 (84%) |       | 3 (10%) vs 27 (90%)   |       |
|                  | 4.30 (-1.27, 9.87)     | 0.13  | -0.70 (-11.02, 9.63)   | 0.9   | -3.71 (-14.30, 6.88)  | 0.5   | -9.14 (-31.65, 13.38) | 0.4   |
| Sexual bother    | 115 (42%) vs 162 (58%) |       | 18 (11%) vs 152 (89%)  |       | 23 (15%) vs 131 (85%) |       | 3 (10%) vs 26 (90%)   |       |
|                  | 1.65 (-3.70, 7.01)     | 0.5   | 2.13 (-7.42, 11.69)    | 0.7   | -6.21 (-13.82, 1.40)  | 0.11  | -7.24 (-34.13, 19.66) | 0.6   |
| 36 months        |                        |       |                        |       |                       |       |                       |       |
| Urinary function | 100 (43%) vs 130 (57%) |       | 16 (9%) vs 162 (91%)   |       | 20 (12%) vs 142 (88%) |       | 3 (9.1%) vs 30 (91%)  |       |
|                  | 3.32 (-0.00, 6.65)     | 0.050 | -1.56 (-6.09, 2.96)    | 0.5   | 1.23 (-2.90, 5.36)    | 0.6   | 12.47 (-0.17, 25.12)  | 0.053 |
| Urinary bother   | 98 (44%) vs 127 (56%)  |       | 16 (9%) vs 162 (91%)   |       | 19 (12%) vs 141 (88%) |       | 2 (6.3%) vs 30 (94%)  |       |
|                  | 2.17 (-1.79, 6.13)     | 0.3   | 0.25 (-4.29, 4.79)     | 0.9   | 2.42 (-2.15, 6.99)    | 0.3   | 4.74 (-14.49, 23.97)  | 0.6   |
| Bowel function   | 102 (44%) vs 128 (56%) |       | 16 (9%) vs 162 (91%)   |       | 19 (12%) vs 140 (88%) |       | 3 (9.4%) vs 29 (91%)  |       |
|                  | -0.27 (-1.55, 1.01)    | 0.7   | -0.07 (-3.89, 3.75)    | 1     | 4.83 (0.81, 8.84)     | 0.019 | 15.72 (6.48, 24.96)   | 0.002 |
| Bowel bother     | 103 (44%) vs 129 (56%) |       | 16 (9.1%) vs 160 (91%) |       | 20 (13%) vs 138 (87%) |       | 3 (10%) vs 27 (90%)   |       |

|                 |                        |     |                        |     |                       |       |                       |       |
|-----------------|------------------------|-----|------------------------|-----|-----------------------|-------|-----------------------|-------|
|                 | -0.03 (-2.29, 2.23)    | 1   | 0.41 (-7.35, 8.17)     | 0.9 | 7.02 (0.57, 13.47)    | 0.033 | 16.60 (4.28, 28.93)   | 0.011 |
| Sexual function | 104 (45%) vs 129 (55%) |     | 15 (8.9%) vs 154 (91%) |     | 19 (12%) vs 136 (88%) |       | 3 (9.1%) vs 30 (91%)  |       |
|                 | 1.44 (-5.22, 8.09)     | 0.7 | -0.91 (-12.38, 10.57)  | 0.9 | -5.83 (-17.64, 5.98)  | 0.3   | 8.32 (-21.28, 37.93)  | 0.6   |
| Sexual bother   | 101 (45%) vs 124 (55%) |     | 15 (8.9%) vs 154 (91%) |     | 18 (12%) vs 134 (88%) |       | 2 (6.7%) vs 28 (93%)  |       |
|                 | 3.47 (-2.69, 9.64)     | 0.3 | 0.94 (-9.10, 10.99)    | 0.9 | -3.65 (-11.31, 4.01)  | 0.3   | -6.69 (-35.53, 22.14) | 0.6   |

---
